# Supplementary material for: Development and Validation of An Oral Frailty Assessment Tool for Older Adults Based on the COSMIN Risk of Bias Checklist: A Cross-Sectional Study
Source: Research Square preprint supplement (doi:10.21203/rs.3.rs-8255755/v1), 2025-12-15
Supplement: Supplementary file 1 [file ba8c73ee27d26a392aac912d.docx]

Table S1: Modification status of Delphi expert consultation

| Dimension | Contents | Items | Modification status  the first round | Modification status  the second round |
| --- | --- | --- | --- | --- |
| Function decline | eating | A1. Do you ever bite your tongue when eating? | Merge with A2 and A3 to form " Do you tend to bite your tongue or your cheek when you eat?" | Change to "Would you accidentally bite yourself when eating?" |
| A2. Do you tend to bite your lips when eating? | Delete | / |
| A3. Do you ever bite your cheek when eating? | Delete | / |
| chewing | Do you have any missing teeth? | Add | Delete |
| A4. Do you chew more on one side than the other? | Delete | / |
| A5. Do you have difficulty in eating nuts such as peanuts, sunflower seeds, cashews or similar hard foods? | Combined with A6, it becomes "Did it become more difficult for you to eat the same hard food (such as nuts) or chewy food (such as dried meat) compared to before?" | Change to “Have you found it more difficult to eat hard foods (such as nuts) or chewy foods (such as dried meat) than before?” |
| A6. Do you have difficulty in eating meat such as steaks, pork ribs, tough cuts of meat or foods of similar texture? | Delete | / |
| A7. Has your chewing speed slowed down? | Change to “Has your chewing speed slowed down compared to before?” | Change to “Have you noticed that you are chewing your food more slowly than before？” |
| A8. Have you reduced the number of times you chew before swallowing? | Change to ” H Have you been chewing more times before swallowing than you used to?” | Maintain |
| A9. Have you been limited in the types of food you can consume due to difficulty in chewing? | Change to “Are you unable to eat certain foods because you cannot bite through them or chew them thoroughly?” | Maintain |
| A10. Have you changed the hardness of the food because it was difficult to chew? (For example, by changing the cooking method or extending the cooking time, etc.) | Merge with A11 to form “Have you altered the size or texture of your food due to difficulty chewing? (For example, by cutting food into smaller pieces, changing cooking methods, or increasing cooking time.)” | Maintain |
| A11. Have you changed the size of your food because it's difficult to chew? (For example, by cutting the food into pieces?) | Delete | / |
| A12. Do you prefer soft food? | Delete | / |
| A13. Has your chewing ability deteriorated? | Delete | / |
| A14. Are you troubled by the act of chewing? | Merge A21 and A25 into "Are you troubled by the decline in your oral function?" and adjust the order. | Change to “Are you troubled by changes in your oral condition, such as difficulty chewing, swallowing difficulties, dry mouth, or sensitivity?” |
| Swallowing | A15. Did you experience choking or coughing while eating? | Change to “Do you experience coughing or choking when drinking liquids like water or soup??” | Maintain |
| A16. Do you have difficulty swallowing liquids? | Delete | / |
| A17. Do you have difficulty swallowing solid food? | Change to “Have you found it more difficult than before to swallow solid foods such as dry rice or biscuits?” | Maintain |
| A18. Do you feel that there is food stuck in your throat when you swallow? | Change to “Do you ever feel as though food is stuck in your throat when you swallow?” | Maintain |
| A19. Do you have symptoms of drooling? | Change to “Do you find yourself involuntarily salivating?” | Maintain |
| Do you spill food when you eat? | Add | Maintain |
| Can you swallow saliva 3 times within 30 seconds? | Add | Delete |
| A20. Your swallowing problem has caused you to lose weight? | Delete | / |
| A21. Do you feel nervous when swallowing? | Delete | / |
| Pronunciation | A22. Are you speaking unclearly? | Change to “Have you noticed or have others reported that your speech has become slurred?” | Maintain |
| A23. You seem to have difficulty speaking? | Change to “You seem to be having difficulty speaking?” | Maintain |
| A24. Will you slow down your speaking speed so that others can understand what you are saying? | Change to “Have you slowed down your speaking speed compared to before?” | Delete |
| A25. Are you troubled by pronunciation issues? | Delete | / |
| Tasting | A26. Do you find the taste of the food very weak when you are eating? | Change to “Do you find that the taste of the food becomes less intense when you eat?” | Maintain |
| A27. Have your abilities to distinguish sweet, sour, bitter, spicy and salty flavors declined? | Delete | / |
| A28. Have you experienced a decrease in appetite due to a decline in your sense of taste? | Maintain | Delete |
| Feeling | A29. Do you have any obvious symptoms such as lumps, ulcers, or plaques that cause numbness in your mouth? | Merge with A30, A31, and A32 to form "Do you experience any abnormal sensations in your mouth for unknown reasons? (such as numbness in the mouth, burning sensation, foreign body sensation, stinging sensation, etc.)", and adjust it to the dimension of discomfort. | Maintain |
| A30. Do you have any obvious symptoms such as lumps, ulcers, or plaques that cause a sensation of foreign matter in your mouth? | Delete | / |
| A31. Do you have any obvious symptoms such as lumps, ulcers, or plaques that cause a burning sensation in your mouth? | Delete | / |
| A32. Do you have any obvious symptoms such as lumps, ulcers, or plaques causing pain in your mouth? | Delete | / |
| Discomfort | Dry mouth | B1. Do you experience dry mouth during the night or when you wake up? | Merge with B2, B4, B5, B7, and B8 to form "D o you find yourself feeling more prone to dry mouth than before?" | Maintain |
| B2. Do you feel parched during the day? Even drinking water doesn't help. | Delete | / |
| B3. Do you feel that your saliva production has decreased? | Maintain | Delete |
| B4. Do you feel thirsty when you haven't eaten? | Delete | / |
| B5. Do you feel dry in your mouth when you are eating? | Delete | / |
| B6. Do you need to drink liquids to assist in chewing and swallowing dry food? | Maintain | Change to “Do you need to drink water or soup to aid chewing and swallowing dry foods?” |
| B7. Do you feel your throat is dry? | Delete | / |
| B8. Do you feel your lips are dry? | Delete | / |
| B9. Do you feel any stickiness in your mouth? | Maintain | Delete |
| B10. Do you need to moisten your mouth because of dryness? | Change to “Do you frequently drink water to moisten your mouth due to dryness?” | Maintain |
| Oral malodour | B11. Do you have bad breath? | Change to “Do you yourself feel that you have bad breath, or do others around you notice it?” | Change to “Do you yourself notice any oral malodour, or do others around you report that you have oral malodour?” |
| B12. Have you reduced your social interactions with others because of bad breath? | Delete | / |
| Tooth sensitivity | B13. Are your teeth or gums sensitive to cold, hot, sour or sweet? | Change to “Do your teeth feel more sensitive or painful than before when eating cold, hot, acidic or sweet foods?” | Maintain |
| Food impaction | B14. Do you have food stuck in your teeth? | Change to “Do you find food getting stuck in your teeth more easily than before?” | Maintain |
| B15. After meals, do you have to use tools such as toothpicks or dental floss to clean your teeth and make them feel comfortable? | Delete | / |
| Oral pain | B16. Do you feel any pain in your teeth? | Delete | / |
| B17. Do you experience any pain in your mouth other than in your teeth? | / |
| B18. Does the pain affect your eating? | / |
| B19. Does the pain affect your sleep? | / |
| Increased vulnerability | Fragile mucous membranes | C1. Will eating a small amount of hard food cause damage to the oral mucosa, such as ulcers, blisters, or bleeding? | Delete | / |
| Joint instability | C2. Do you tend to have your temporomandibular joints dislocated? | / |
| Prone to disease | C3. Do you tend to suffer from gum diseases such as gingivitis and periodontitis? | / |
| C4. Do you tend to suffer from tooth diseases such as tooth decay? | / |
| C5. Do you tend to suffer from mucosal diseases such as oral ulcers? | / |

Note: A represents the dimension of functional decline during the expert consultation stage, B represents the dimension of discomfort feelings during the expert consultation stage, and C represents the dimension of increased vulnerability during the expert consultation stage.

Table S2: The importance and feasibility scores of the items and dimensions in the first round of the expert consultation scale

| **Dimension** | **Item** | Importance | | Feasibility | |
| --- | --- | --- | --- | --- | --- |
| **Mean** | **Cv** | **Mean** | **Cv** |
| A |  | 5.00 | 0.000 | / | / |
|  | A1 | 4.31 | **0.305** | 4.38 | 0.272 |
|  | A2 | 4.08 | **0.324** | 4.38 | 0.272 |
|  | A3 | 4.15 | **0.324** | 4.38 | 0.272 |
|  | A4 | 4.08 | **0.324** | 4.38 | 0.272 |
|  | A5 | 4.77 | 0.126 | 4.85 | 0.114 |
|  | A6 | 4.69 | 0.160 | 4.69 | 0.160 |
|  | A7 | 4.54 | 0.248 | 4.54 | 0.248 |
|  | A8 | 4.38 | 0.256 | 4.46 | 0.253 |
|  | A9 | 4.77 | 0.092 | 4.92 | 0.056 |
|  | A10 | 4.69 | 0.134 | 4.77 | 0.126 |
|  | A11 | 4.46 | 0.174 | 4.62 | 0.166 |
|  | A12 | 4.46 | 0.253 | 4.62 | 0.243 |
|  | A13 | 4.62 | 0.243 | 4.31 | 0.290 |
|  | A14 | 4.54 | 0.248 | 4.46 | 0.253 |
|  | A15 | 4.92 | 0.056 | 4.92 | 0.056 |
|  | A16 | 4.77 | 0.126 | 4.62 | 0.166 |
|  | A17 | 5.00 | 0.000 | 4.77 | 0.126 |
|  | A18 | 4.54 | 0.248 | 4.46 | 0.269 |
|  | A19 | 4.54 | 0.193 | 4.54 | 0.193 |
|  | A20 | 4.31 | 0.274 | 4.38 | 0.272 |
|  | A21 | 4.23 | 0.276 | 4.15 | **0.308** |
|  | A22 | 5.00 | 0.000 | 5.00 | 0.000 |
|  | A23 | 4.62 | 0.243 | 4.62 | 0.243 |
|  | A24 | 4.46 | 0.253 | 4.54 | 0.248 |
|  | A25 | 4.38 | 0.256 | 4.31 | 0.274 |
|  | A26 | 4.54 | 0.248 | 4.46 | 0.269 |
|  | A27 | 4.54 | 0.248 | 4.46 | 0.253 |
|  | A28 | 4.62 | 0.243 | 4.62 | 0.243 |
|  | A29 | 4.46 | 0.269 | 4.00 | **0.354** |
|  | A30 | 4.46 | 0.269 | 4.00 | **0.354** |
|  | A31 | 4.38 | 0.272 | **3.92** | **0.352** |
|  | A32 | 4.31 | **0.347** | 4.00 | **0.354** |
| B |  | 4.85 | 0.077 | / | / |
|  | B1 | 4.62 | 0.243 | 4.62 | 0.243 |
|  | B2 | 4.62 | 0.243 | 4.62 | 0.243 |
|  | B3 | 4.85 | 0.077 | 4.85 | 0.077 |
|  | B4 | 4.62 | 0.243 | 4.69 | 0.182 |
|  | B5 | 4.54 | 0.248 | 4.62 | 0.188 |
|  | B6 | 4.92 | 0.056 | 4.92 | 0.056 |
|  | B7 | 4.54 | 0.248 | 4.62 | 0.243 |
|  | B8 | 4.46 | 0.253 | 4.54 | 0.248 |
|  | B9 | 4.62 | 0.243 | 4.54 | 0.248 |
|  | B10 | 4.46 | 0.269 | 4.15 | 0.292 |
|  | B11 | 4.15 | **0.352** | 4.00 | **0.368** |
|  | B12 | 4.15 | **0.352** | 4.00 | **0.368** |
|  | B13 | 4.77 | 0.092 | 4.62 | 0.141 |
|  | B14 | 4.69 | 0.134 | 4.62 | 0.166 |
|  | B15 | 4.69 | 0.134 | 4.62 | 0.166 |
|  | B16 | 4.38 | 0.288 | 4.46 | 0.269 |
|  | B17 | 4.31 | 0.290 | 4.38 | 0.272 |
|  | B18 | **3.92** | **0.396** | 4.15 | **0.366** |
|  | B19 | **3.92** | **0.396** | 4.15 | **0.366** |
| C |  | 4.31 | **0.305** | / | / |
|  | C1 | 4.31 | **0.347** | 4.38 | **0.343** |
|  | C2 | 4.08 | **0.367** | 4.15 | **0.366** |
|  | C3 | 4.23 | **0.350** | 4.15 | **0.366** |
|  | C4 | 4.23 | **0.350** | 4.31 | **0.347** |
|  | C5 | 4.23 | **0.350** | 4.15 | **0.366** |

Note: A represents the dimension of functional decline during the expert consultation stage, B represents the dimension of discomfort feelings during the expert consultation stage, and C represents the dimension of increased vulnerability during the expert consultation stage. The grey background indicates that at least one of the indicators, such as the importance or feasibility score or coefficient of variation, for the corresponding item has not met the requirements. The bold font indicates that the indicator does not meet the requirements. **All the items and dimensions in the second round met the requirements.**

Table S3: Summary of item analysis results

| **Items** | **Critical ratio** | | **Correlation coefficient** | **Cronbach's coefficient** | **Factor Analysis** | | **Maintain** |
| --- | --- | --- | --- | --- | --- | --- | --- |
| **CR** | ***p*** | **commonality** | **factor loading** |
| AA1 Bit himself while eating | **2.716** | 0.012 | **0.340** | **↓** | **0.175** | **0.419** | **🞫** |
| AA2 Difficult to eat hard/firm foods | 5.446 | ＜0.001 | 0.670 | **↓** | 0.500 | 0.707 | **🗸** |
| AA3 Slower chewing speed | 4.467 | ＜0.001 | 0.577 | **↓** | 0.279 | 0.528 | **🗸** |
| AA4 Increased the number of chewing actions | 3.544 | 0.002 | 0.456 | **↓** | 0.348 | 0.590 | **🗸** |
| AA5 Restricts the types of food that can be consumed | 8.431 | ＜0.001 | 0.711 | **↓** | 0.529 | 0.727 | **🗸** |
| AA6 Modifies the properties of food | 6.681 | ＜0.001 | 0.675 | **↓** | 0.561 | 0.749 | **🗸** |
| AA7 Choked while drinking water | 4.465 | ＜0.001 | 0.432 | **↓** | 0.273 | 0.522 | **🗸** |
| AA8 Difficulty swallowing solid food | 3.608 | 0.002 | 0.499 | **↓** | 0.387 | 0.622 | **🗸** |
| AA9 Throat sensation | **2.802** | 0.012 | 0.469 | **↓** | 0.444 | 0.667 | **🗸** |
| AA10 Uncontrollable drooling | 3.705 | 0.001 | 0.455 | **↓** | **0.139** | **0.373** | **🗸** |
| AA11 Food Leakage | **2.590** | 0.018 | 0.404 | **↓** | 0.337 | 0.580 | **🞫*** |
| AA12 Speaks unclearly | **2.414** | 0.025 | **0.384** | **↓** | 0.207 | 0.455 | **🞫** |
| AA13 Difficulty speaking | **2.497** | 0.019 | **0.333** | **↓** | **0.121** | **0.347** | **🞫** |
| AA14 Taste of the food has become less intense | **2.968** | 0.006 | **0.391** | **↑** | **0.081** | **0.285** | **🞫** |
| BB1 Prone to dry mouth. | 5.041 | ＜0.001 | 0.587 | **↓** | 0.265 | 0.515 | **🗸** |
| BB2 Drinking water to keep hydrated | 4.142 | ＜0.001 | 0.536 | **↓** | 0.200 | 0.447 | **🗸** |
| BB3 Dry food with water | 4.073 | 0.001 | 0.470 | **↓** | 0.206 | 0.454 | **🗸** |
| BB4 Oral odor | 3.573 | 0.002 | **0.357** | **不变** | **0.080** | **0.283** | **🞫** |
| BB5 Sensitive teeth | 3.584 | 0.001 | 0.430 | **↓** | 0.210 | 0.458 | **🗸** |
| BB6 Food getting stuck in the teeth | 3.735 | 0.001 | 0.407 | **↓** | 0.257 | 0.507 | **🗸** |
| BB7 Abnormal sensations in the mouth | **2.111** | 0.049 | **0.196** | **↑** | **0.042** | **0.204** | **🞫** |
| BB8 Trouble | 3.867 | 0.001 | 0.487 | **↓** | 0.282 | 0.531 | **🗸** |

Note: AA represents the dimension of functional decline during the item analysis stage, and BB represents the dimension of discomfort during the item analysis stage.

Table S4 Final version of the CGOFAS

In the past six months, have you experienced any of the following?

| Dimension | Item | Score | | | | |
| --- | --- | --- | --- | --- | --- | --- |
| 0 | 1 | 2 | 3 | 4 |
| Masticatory function | Have you found it more difficult to eat hard foods (such as nuts) or chewy foods (such as dried meat) than before? |  |  |  |  |  |
| Have you noticed that you are chewing your food more slowly than before? |  |  |  |  |  |
| Have you been chewing more times before swallowing than you used to? |  |  |  |  |  |
| Are you unable to eat certain foods because you cannot bite through them or chew them thoroughly? |  |  |  |  |  |
| Have you altered the size or texture of your food due to difficulty chewing? (For example, by cutting food into smaller pieces, changing cooking methods, or increasing cooking time.) |  |  |  |  |  |
| Swallowing function | Have you found it more difficult than before to swallow solid foods such as dry rice or biscuits? |  |  |  |  |  |
| Do you need to drink water or soup to aid chewing and swallowing dry foods? |
| Dry mouth | Do you find yourself feeling more prone to dry mouth than before? |  |  |  |  |  |
| Do you frequently drink water to moisten your mouth due to dryness? |
| Psychosocial | Are you troubled by changes in your oral condition, such as difficulty chewing, swallowing difficulties or dry mouth? |  |  |  |  |  |

Note:0 denotes none/not at all, 1 denotes mild/rarely, 2 denotes moderate/occasionally, 3 denotes severe/frequently, 4 denotes very severe/always
